# Supplementary material
Source: PubMed Central journal article supplement (PMC3993630)
Supplement: JCM.03544-13_zjm999093364so1.pdf [file JCM.03544-13_zjm999093364so1.pdf]

**TABLE S1** Statistical significance when comparing the results from the different detection methods

| Method (n=no. of labs)       | No. VME/<br>total R | No. ME/<br>total S | Significant difference Fisher's exact test (p-value) |                    |                       |                    |
|------------------------------|---------------------|--------------------|------------------------------------------------------|--------------------|-----------------------|--------------------|
|                              |                     |                    | VME and ME                                           |                    | VME                   |                    |
|                              |                     |                    | versus disk diffusion                                | versus agar screen | versus disk diffusion | versus agar screen |
| EUCAST disk diffusion (n=28) | 53/756              | 2/84               | -                                                    | -                  | -                     | -                  |
| CLSI agar screen (n=18)      | 32/486              | 3/54               | NS                                                   | -                  | NS                    | -                  |
| VITEK 2 (n=5)                | 18/135              | 0/15               | SD (p=0.0263)                                        | SD (p=0.0360)      | SD (p=0.0231)         | SD (p=0.0186)      |

VME; classified as S when containing *van* genotype, ME; classified as R when containing no *van* genotype, [NS; no significant difference](#), [SD; significant difference](#).

**Table S2** Number of very major (VME) and major errors (ME) calculated for EUCAST disk diffusion and CLSI agar screen divided into both experience with method and type of agar used for  $n \geq 5$

| Method            | Media (no. of labs) | VME in % (IE/E) | No. VME/ total no. R<br>IE, E | ME in % (IE/E) | No. ME/ total<br>no. S IE, E |
|-------------------|---------------------|-----------------|-------------------------------|----------------|------------------------------|
| Disk<br>diffusion | Oxoid MH (4IE/12E)  | 2.9 (7.4/1.9)   | 8/108, 6/324                  | 0              |                              |
|                   | BBL MH II (9IE/1E)  | 14 (14/11)      | 34/243, 3/27                  | 6.7 (7.4/0)    | 2/27, 0/3                    |
| Agar screen       | BHI Difco (7E/1IE)  | 4.2 (4/4)       | 8/189, 1/27                   | 0              |                              |
|                   | BHI Oxoid (5E)      | 11              | 15/135                        | 0              |                              |

VME; classified as S when containing *van* genotype, ME; classified as R when containing no *van* genotype, E; experienced, IE; inexperienced,

[NS](#); no significant difference, [SD](#); significant difference.

**Table S3** Statistical significance when comparing results by both experience with method and type of agar used for  $n \geq 5$

| Method                      | Media (no. of labs) | No. VME/<br>total<br>no. R | No. ME/<br>total<br>no. S | Significant difference Fisher's exact test (p-value) |                        |                       |                        |
|-----------------------------|---------------------|----------------------------|---------------------------|------------------------------------------------------|------------------------|-----------------------|------------------------|
|                             |                     |                            |                           | VME and ME                                           |                        | VME versus IE         |                        |
|                             |                     |                            |                           | versus Oxoid MH<br>IE                                | versus BBL MH II<br>IE | versus Oxoid MH<br>IE | versus BBL MH II<br>IE |
| EUCAST<br>disk<br>diffusion | BBL MH II (9IE)     | 34/243                     | 2/27                      | NS                                                   | -                      | NS                    | -                      |
|                             | BBL MH II (1E)      | 3/27                       | 0/3                       | -                                                    | NS                     | -                     | NS                     |
|                             | Oxoid MH (4IE)      | 8/108                      | 0/12                      | -                                                    | -                      | -                     | -                      |
|                             | Oxoid MH (12E)      | 6/324                      | 0/36                      | SD (p=0.0093)                                        | -                      | SD (p=0.0092)         | -                      |
|                             |                     |                            |                           | versus Difco BHI E                                   |                        | versus Difco BHI E    |                        |
| CLSI agar<br>screen         | BHI Difco (7E)      | 8/189                      | 0/21                      |                                                      | -                      |                       | -                      |
|                             | BHI Oxoid (5E)      | 15/135                     | 0/15                      |                                                      | SD (p=0.0270)          |                       | SD (p=0.0264)          |

VME; classified as S when containing *van* genotype, ME; classified as R when containing no *van* genotype, E; experienced, IE; inexperienced,

[NS; no significant difference, SD; significant difference.](#)
